# Supplementary material for: Gated recurrence enables simple and accurate sequence prediction in stochastic, changing, and structured environments
Source: eLife journal article supplement (doi:10.7554/elife.71801), 2021-12-02
Supplement: supp [file elife-71801-supp-v1.zip]

Archive with 5 entries (5 files):
- elife_poa_e71801_Transparent_Reporting_File.docx
- elife_poa_e71801_Figure_1_figure_supplement_1.pdf
- elife_poa_e71801_Figure_3_figure_supplement_1.pdf
- elife_poa_e71801_Figure_6_figure_supplement_1.pdf
- elife_poa_e71801_Figure_8_figure_supplement_1.pdf
