# Supplementary material for: Gated recurrence enables simple and accurate sequence prediction in stochastic, changing, and structured environments
Source: eLife journal article supplement (doi:10.7554/elife.71801), 2021-12-02
Supplement: supp [file elife-71801-supp-v1.zip › elife_poa_e71801_Figure_1_figure_supplement_1.pdf]

Changing unigram environment

Changing bigram environment with independent change points

Changing bigram environment with coupled change points

Change points  
(binary)

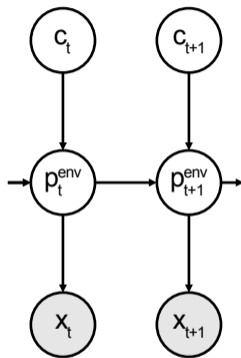

Latent probabilities  
(continuous in  $[0,1]$ )

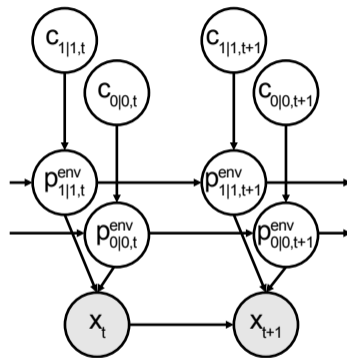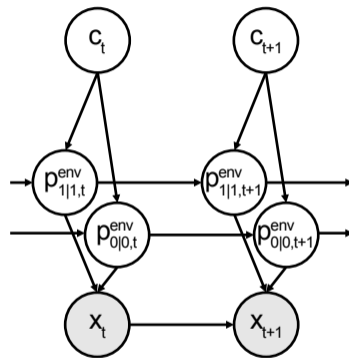

Observations  
(binary)

○ Latent variable

● Observed variable
