# Supplementary figures and images for: Gated recurrence enables simple and accurate sequence prediction in stochastic, changing, and structured environments
Source: eLife journal article supplement (doi:10.7554/elife.71801), 2021-12-02

**a**

Gated recurrent network

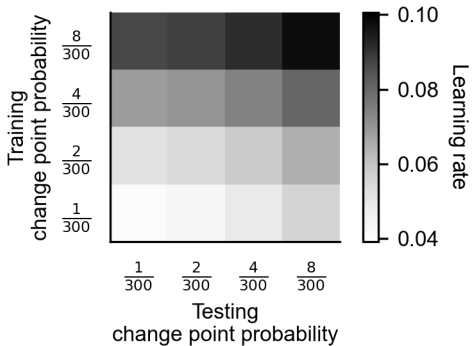**b**

Optimal

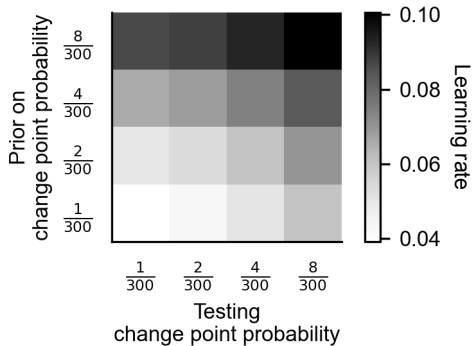

Supplement: supp [file elife-71801-supp-v1.zip › elife_poa_e71801_Figure_3_figure_supplement_1.pdf]

Performance across training and test environments

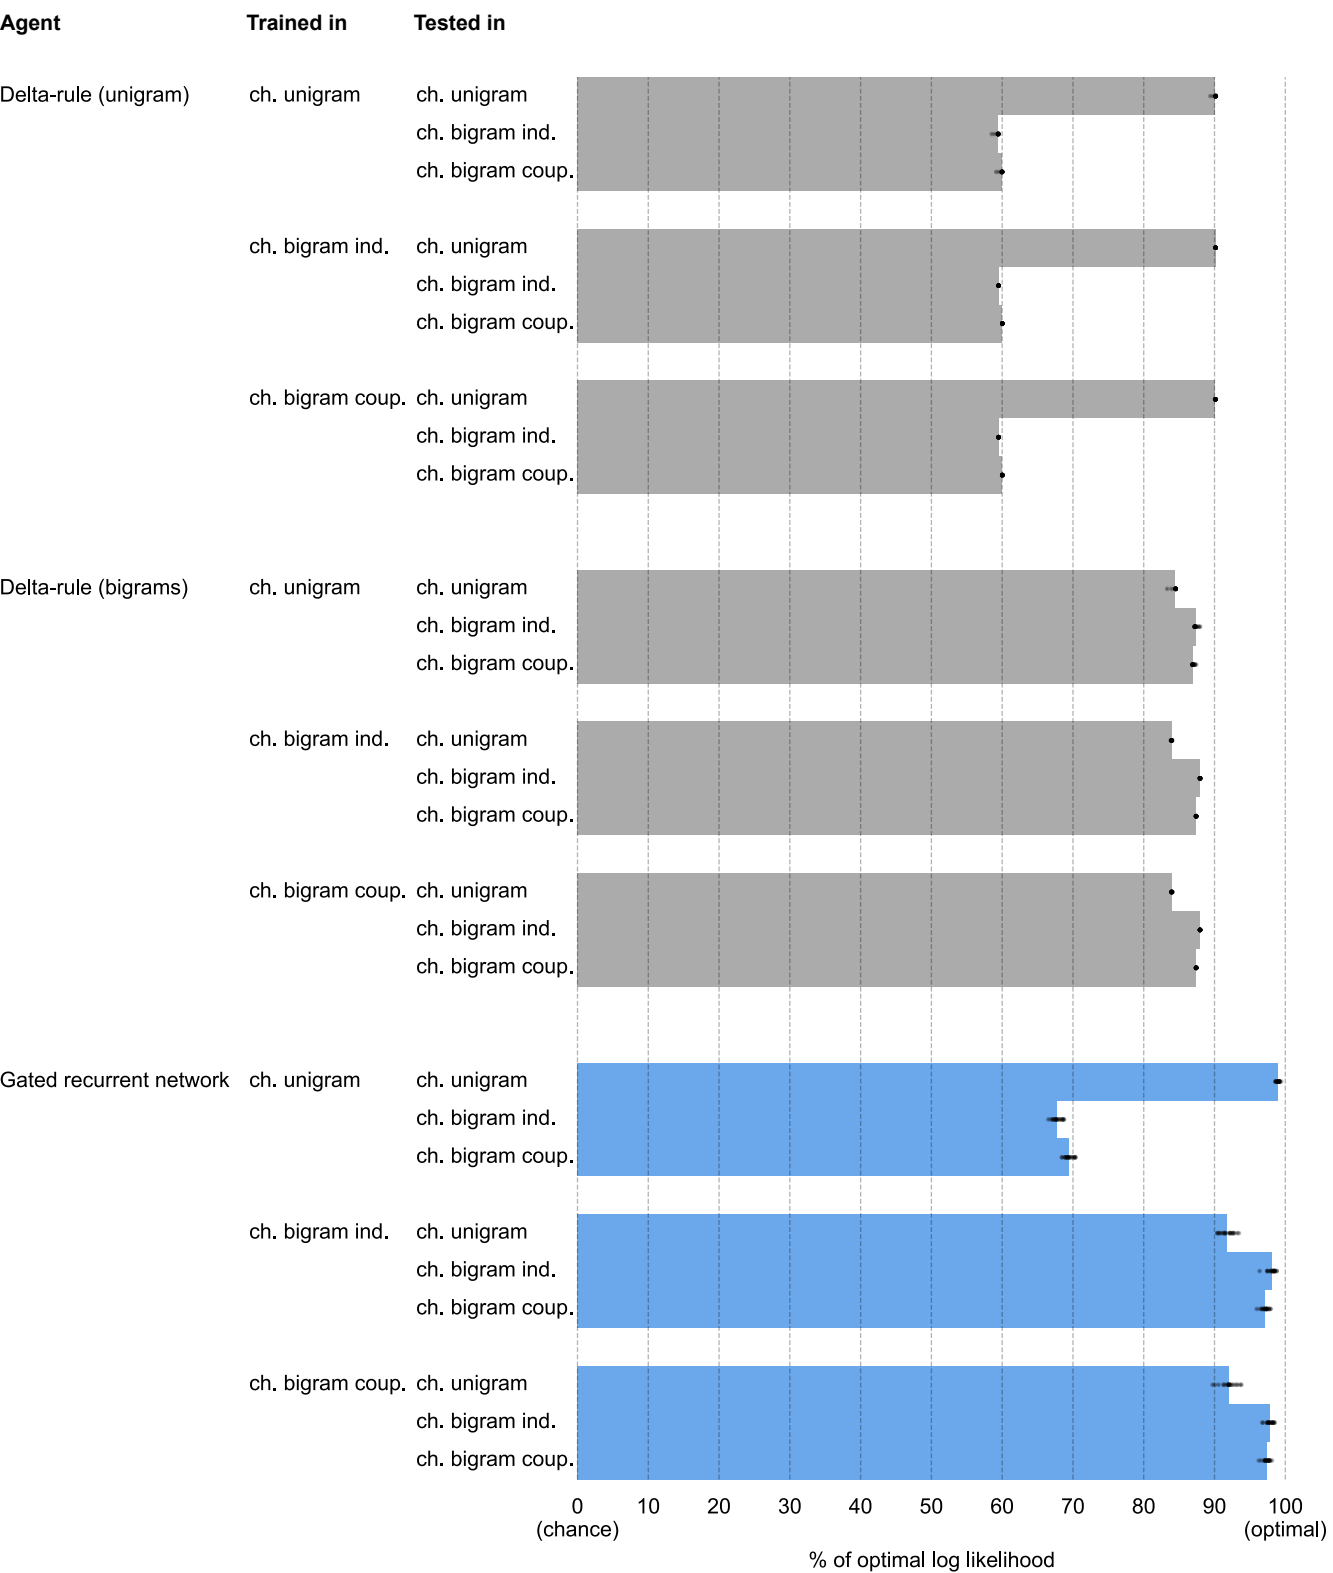

Supplement: supp [file elife-71801-supp-v1.zip › elife_poa_e71801_Figure_6_figure_supplement_1.pdf]

## Training speed

### Changing unigram environment

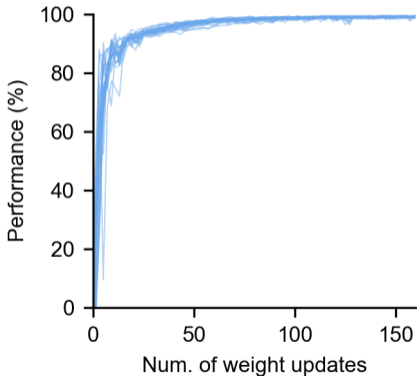

### Changing bigram environment

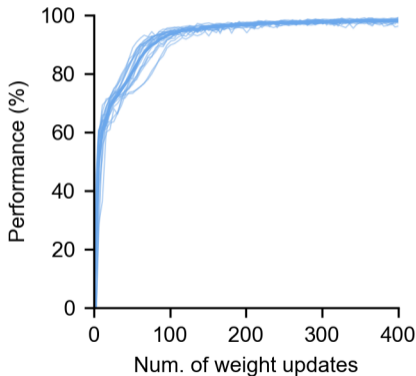

Supplement: supp [file elife-71801-supp-v1.zip › elife_poa_e71801_Figure_8_figure_supplement_1.pdf]
